# Supplementary material for: A universal approach to determine footfall timings from kinematics of a single foot marker in hoofed animals
Source: PubMed Central journal article supplement (PMC4493675; doi:10.7717/peerj.783), 2015-03-26
Supplement: peerj-03-783-s001.pdf [file peerj-03-783-s001.pdf]

1

2

3

4

5

**SUPPLEMENTARY INFORMATION:**

6

7 **A universal approach to determine footfall timings from kinematics of a single foot marker in**  
8 **hoofed animals.**

9

10

11

Sandra D. Starke and Hilary M. Clayton

12

13

14 **Part 1: Four quarantined strides**

15

16 The figure below indicate the four strides (out of thousands) that had to be quarantined and

17 excluded from further analysis due to erroneous features.

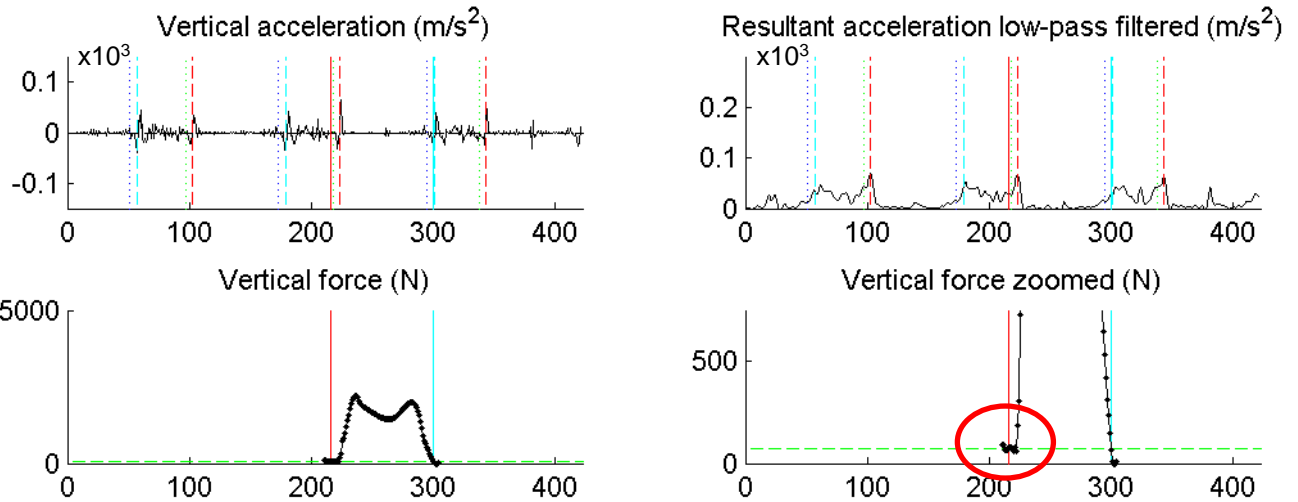

18

19 **Supplementary Figure 1.1.** Stride of RH during walk on the straight line, quarantined due to blip in force trace prior to

20 foot contact.

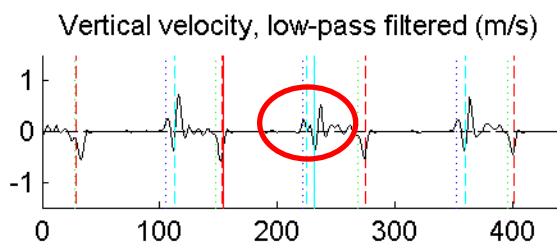

21

22 **Supplementary Figure 1.2.** Stride of LH during walk on the circle with the limb on the inside, quarantined due to noise

23 in filtered lift-off signal.

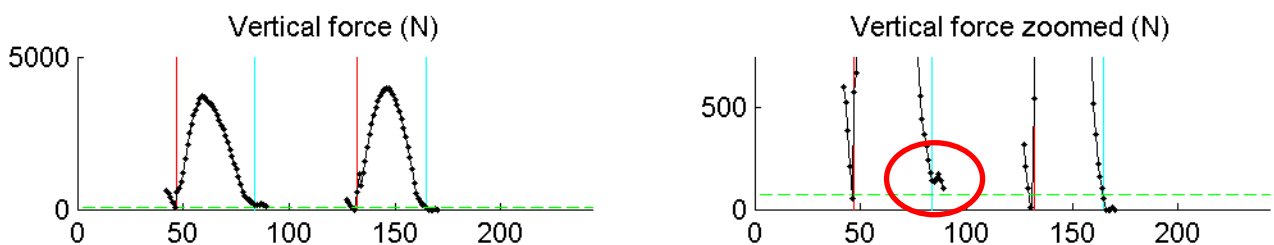

24

25 **Supplementary Figure 1.3.** Stride of LH during trot on the circle with the limb on the outside, quarantined due to

26 unexplained noise in the force at lift off.

27

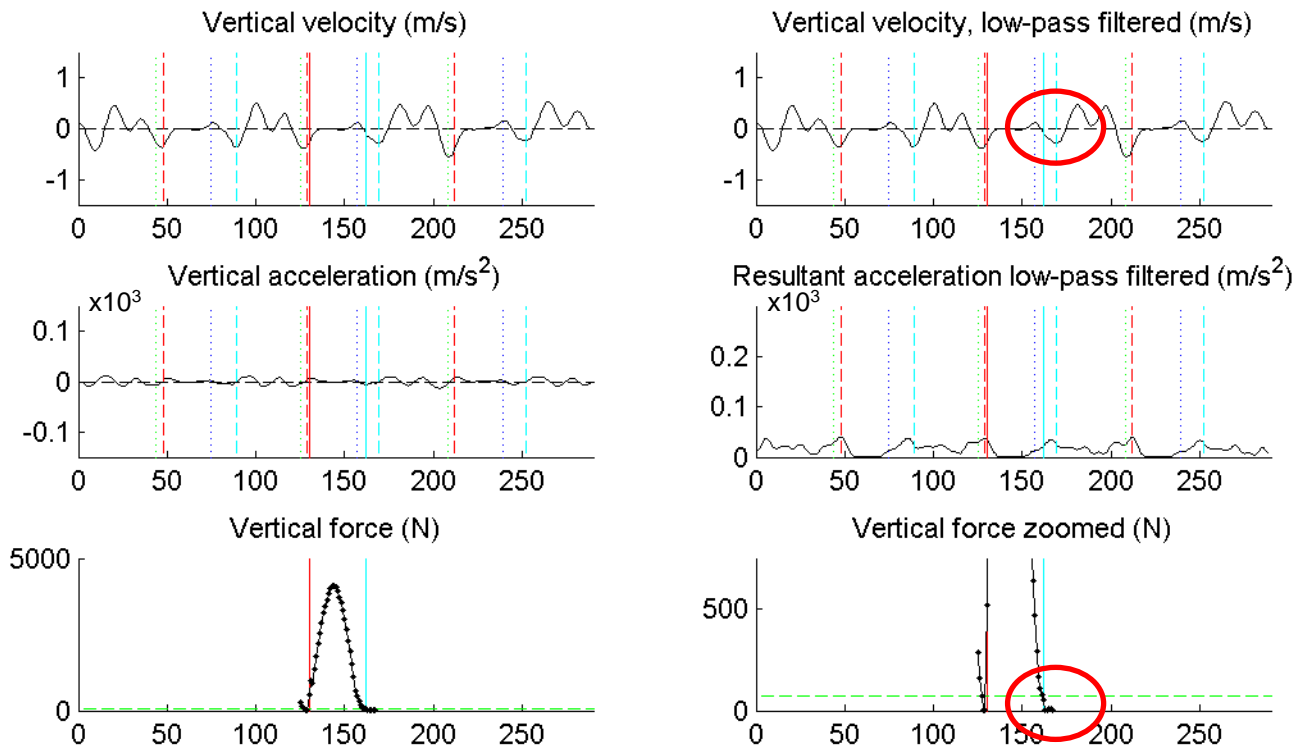

28

29 **Supplementary Figure 1.4.** Stride of RH during trot on the circle with the limb on the inside, quarantined due to  
 30 unexplained mismatch in events between force and kinematic data resulting in a outlier.

31

32

33

34

35 **Part 2: Results for different set velocity thresholds**

36

37 The figures below illustrate example results for accuracy of the velocity-threshold based foot-on  
38 detection method for selected fixed thresholds  $0.5 \text{ m s}^{-1}$  and  $0.7 \text{ m s}^{-1}$ . Thresholds for inside fore-  
39 and hind limbs during trot on the circle had to be adjusted in order to negate the bias.

40

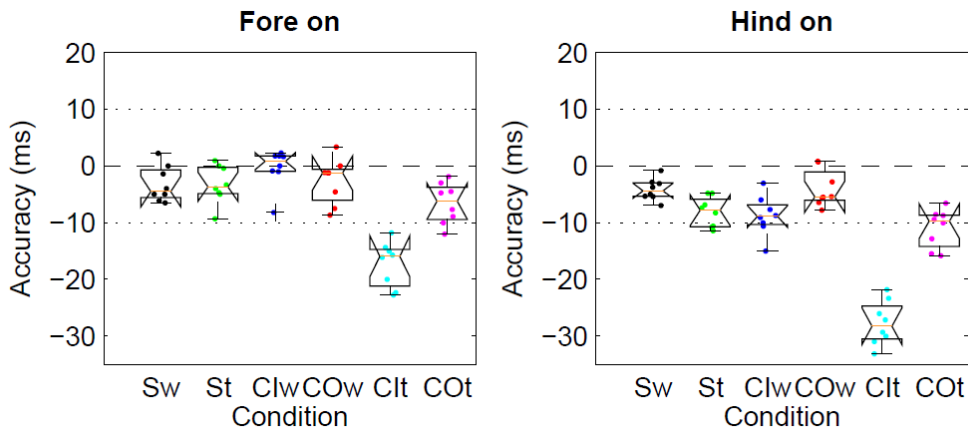

41

42 **Supplementary Figure 2.1.** Accuracy for foot-on events of fore- and hind limbs based on a fixed velocity threshold of  
43  $0.5 \text{ m s}^{-1}$ .

44

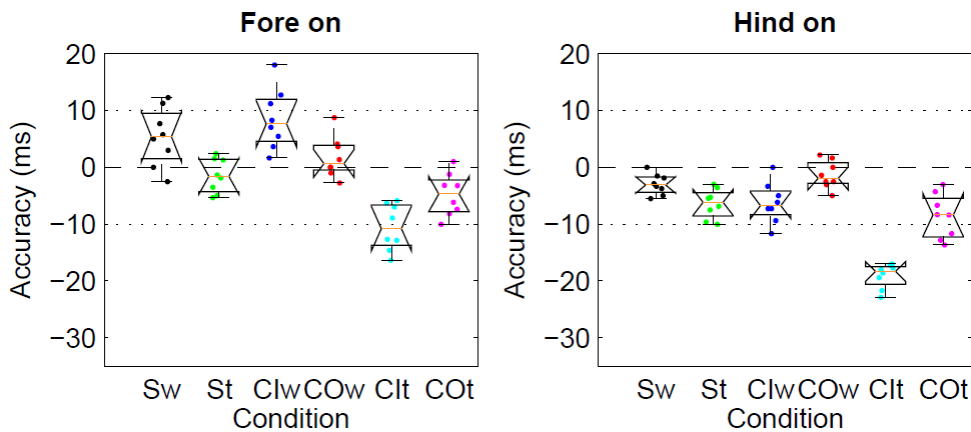

45

46 **Supplementary Figure 2.2.** Accuracy for foot-on events of fore- and hind limbs based on a fixed velocity threshold of  
47  $0.7 \text{ m s}^{-1}$ .

48

49

50 **Part 3: Results for vertical and resultant acceleration-based foot-on detection across all**  
51 **conditions**

52

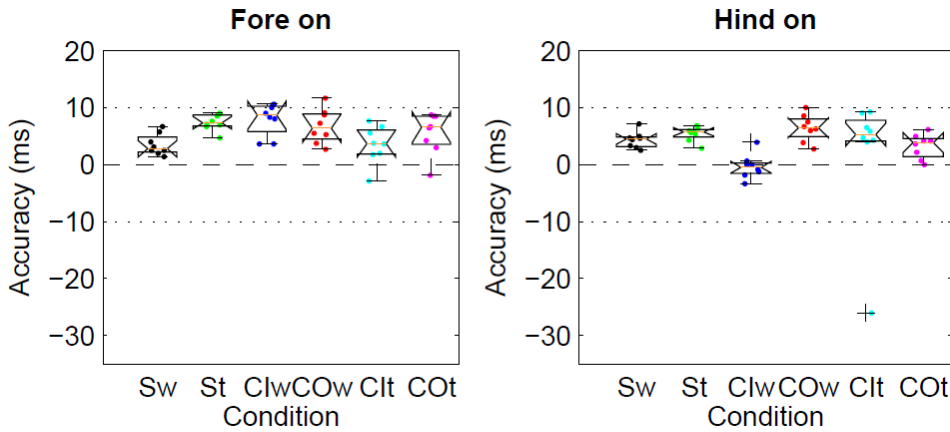

53

54 **Supplementary Figure 3.1.** Accuracy for foot-on events of fore- and hind limbs based on a peak in vertical  
55 acceleration. The outlier for the hind limb, Clt (circle with limb on the inside of the circle, trot) is a result of an absent  
56 distinct signal in the data for this horse.

57

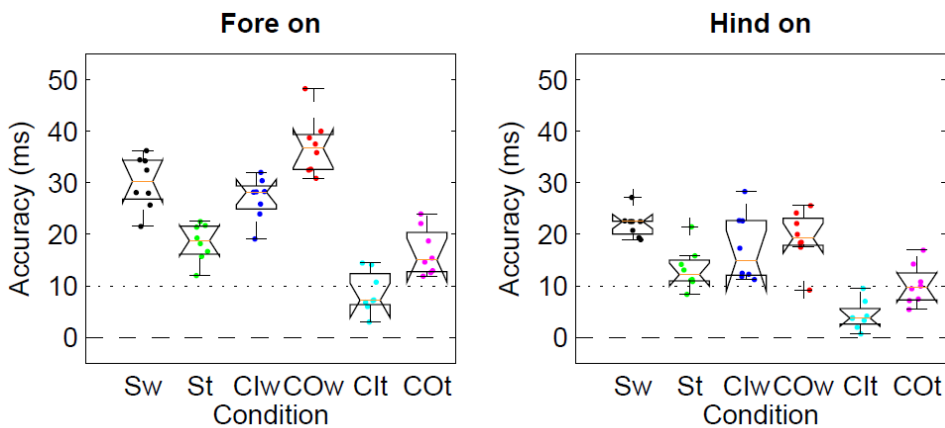

58

59 **Supplementary Figure 3.2.** Accuracy for foot-on events of fore- and hind limbs based on resultant acceleration. While  
60 this method works well for trot on the circle, it introduces unacceptable bias to other conditions due to variability in  
61 signal shape, especially for the forelimbs.

62

63

64

65 **Part 4: Time shift due to double-differentiation**

66

67 The figures below illustrates that double-differentiation usually shifts the data by one frame. In the  
68 present paper we did not correct for this shift, as it was offset by the effect of the low-pass filter.

69

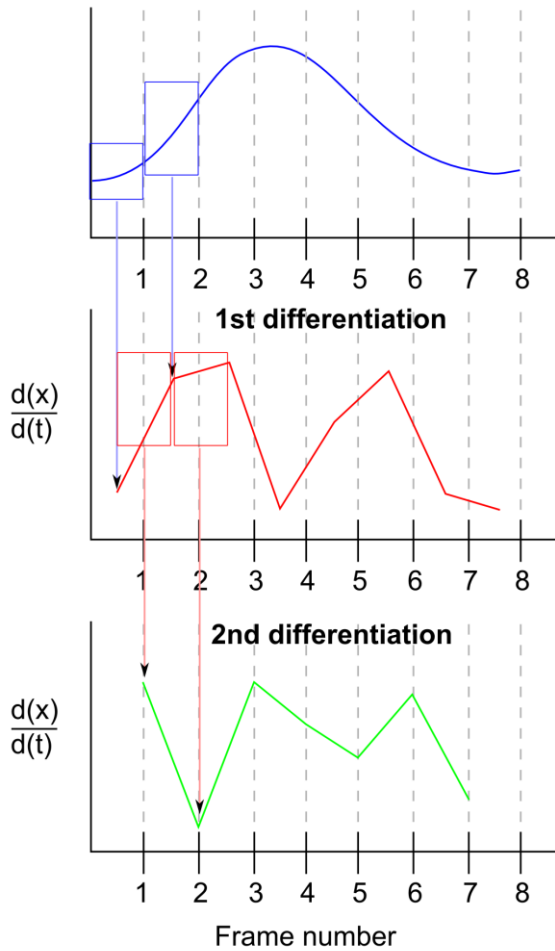

70

71 **Supplementary Figure 4.1.** The effect of double-differentiation on the time code of data. The differentiated signals are  
72 illustrated as absolute values. Simple differentiation calculates a change in a signal within a specified time window.

73 This change is hence an average value and corresponds to the time point in between the two points framing the window.

74 Differentiating this derived signal once more results in the same effect, hence shifting the whole signal one frame to the

75 right.

76
