# Supplementary material for: A universal approach to determine footfall timings from kinematics of a single foot marker in hoofed animals
Source: PeerJ. 2015 Mar 26;3:e783. doi: 10.7717/peerj.783 (PMC4493675; doi:10.7717/peerj.783)
Supplement: Supplemental Information 2 [file peerj-03-783-s002.xlsx]

## Sheet: First run
	True mean:	3.6
	SD	20
	5 data points			10 data points			20 data points			100 data points			1000 data points
	Fine	Coarse		Fine	Coarse		Fine	Coarse		Fine	Coarse		Fine	Coarse
Mean	-6.60738	-8		4.52974	4		2.41447	2		2.03428	2.1		3.74846	3.78
SD	31.1913	32.7109		17.8705	19.5505		22.6957	22.1478		19.6949	20.1657		19.8066	19.9778
	-2.8115	0		-17.734	-20		-11.0834	-10		10.1412	10		-20.4088	-20
	3.8494	0		22.2746	20		2.9837	0		25.2527	30		3.2128	0
	-56.9835	-60		10.6064	10		8.2469	10		23.7215	20		10.4074	10
	-5.5403	-10		3.0199	0		12.1278	10		-9.4182	-10		-15.6646	-20
	28.449	30		7.249	10		-3.8562	0		8.7411	10		25.8785	30
				-27.7011	-30		-1.1291	0		-15.2876	-20		-28.1221	-30
				1.9092	0		44.0738	40		-22.8358	-20		-4.2359	0
				35.6789	40		-41.5671	-40		22.0965	20		-26.0937	-30
				5.567	10		48.1889	50		3.601	0		-3.2925	0
				4.4275	0		10.3513	10		2.5016	0		-22.8783	-20
							23.6012	20		21.8225	20		-7.8967	-10
							-29.6833	-30		15.4917	20		-11.2141	-10
							-8.2007	-10		10.604	10		-20.1	-20
							-1.9613	0		28.605	30		-37.6972	-40
							12.0543	10		22.1958	20		14.9012	10
							-29.804	-30		8.3953	10		43.6028	40
							13.0327	10		-10.2072	-10		48.0666	50
							-20.6569	-20		-9.4311	-10		-6.2436	-10
							4.9238	0		27.442	30		2.6799	0
							16.6471	20		-28.6366	-30		-5.7149	-10
										3.1108	0		5.1189	10
										-35.3769	-40		-14.7754	-10
										24.01	20		-34.7893	-30
										20.8343	20		2.8711	0
										3.6232	0		-20.9025	-20
										2.1833	0		-34.4487	-30
										-46.1257	-50		51.085	50
										15.2234	20		-1.0669	0
										-40.2487	-40		11.6776	10
										-42.7856	-40		27.4494	30
										5.1987	10		-30.0952	-30
										-15.3696	-20		11.863	10
										11.8298	10		13.6349	10
										17.1396	20		5.2613	10
										20.7547	20		6.756	10
										-10.2232	-10		-6.9589	-10
										12.5876	10		18.0612	20
										5.6127	10		-13.3988	-10
										20.1214	20		-12.3277	-10
										14.3231	10		18.1068	20
										21.5578	20		37.3309	40
										0.9612	0		-4.1279	0
										0.656	0		-6.5016	-10
										23.7555	20		11.7615	10
										-38.8731	-40		25.0471	30
										-6.4917	-10		22.9597	20
										-21.8119	-20		9.0029	10
										-4.0517	0		-9.0881	-10
										16.5736	20		16.1953	20
										20.1145	20		2.0153	0
										-16.6989	-20		31.139	30
										-5.8214	-10		-24.5642	-20
										6.3405	10		6.4246	10
										-2.2373	0		29.3944	30
										9.6364	10		-6.2987	-10
										11.5986	10		-8.8965	-10
										-14.9992	-10		-15.0727	-20
										0.0634	0		-1.9745	0
										-39.0419	-40		-0.4105	0
										26.5072	30		6.3348	10
										-8.9818	-10		-14.067	-10
										-20.477	-20		5.2508	10
										-1.4789	0		-8.4775	-10
										-24.9729	-20		-3.7746	0
										3.1828	0		-13.1634	-10
										-7.6133	-10		-2.0495	0
										47.1556	50		74.9974	70
										26.3693	30		71.7506	70
										-46.3377	-50		26.5384	30
										12.4265	10		19.3452	20
										-24.3628	-20		-21.9627	-20
										-1.5011	0		-8.0919	-10
										6.8881	10		-8.7881	-10
										18.5547	20		14.306	10
										-1.8609	0		13.2597	10
										35.126	40		5.7695	10
										-6.0187	-10		-3.2057	0
										10.1502	10		-14.917	-10
										16.8947	20		3.7064	0
										5.3038	10		26.383	30
										21.2191	20		12.1472	10
										10.0643	10		7.2206	10
										-12.0829	-10		16.7496	20
										-32.5075	-30		15.2849	20
										40.7719	40		-28.729	-30
										-8.4906	-10		3.9755	0
										5.6672	10		-4.9192	0
										14.8633	10		-37.0805	-40
										5.8719	10		-22.9711	-20
										-14.4945	-10		-2.7977	0
										-5.7543	-10		20.1086	20
										1.1022	0		-0.9859	0
										33.1792	30		8.845	10
										-13.6163	-10		-14.3596	-10
										19.2934	20		-39.5461	-40
										9.7725	10		5.4783	10
										-1.0772	0		-15.4236	-20
										-17.5395	-20		27.0518	30
										-2.0828	0		38.3019	40
										1.8662	0		-3.8339	0
													27.4573	30
													22.673	20
													-24.7009	-20
													2.9329	0
													8.8224	10
													14.0599	10
													17.1357	20
													17.0879	20
													17.168	20
													-2.6516	0
													11.1849	10
													-41.458	-40
													-19.767	-20
													27.6393	30
													-9.6148	-10
													10.1512	10
													33.7625	30
													-14.1782	-10
													-15.5857	-20
													-6.2544	-10
													12.4211	10
													-0.4953	0
													-15.9561	-20
													-27.8589	-30
													-3.8052	0
													-0.8229	0
													-7.1043	-10
													-1.6394	0
													-18.3083	-20
													14.5847	10
													-39.8924	-40
													6.4923	10
													16.9807	20
													-13.3766	-10
													2.4582	0
													9.4357	10
													-8.6924	-10
													3.3271	0
													11.8423	10
													-15.143	-20
													20.3031	20
													25.4908	30
													10.0236	10
													3.9023	0
													-19.6899	-20
													13.4968	10
													-20.717	-20
													35.4158	40
													14.1295	10
													8.8964	10
													-4.272	0
													-39.9262	-40
													-20.3131	-20
													10.9066	10
													51.8489	50
													18.4049	20
													9.7949	10
													-7.2397	-10
													6.0457	10
													22.8456	20
													-1.4795	0
													41.4351	40
													-20.8051	-20
													-3.9247	0
													4.6486	0
													-35.4787	-40
													14.9084	10
													5.1559	10
													5.214	10
													19.4942	20
													24.4738	20
													19.6437	20
													-5.7765	-10
													2.6682	0
													10.6691	10
													-21.536	-20
													-17.1206	-20
													-4.9393	0
													5.1534	10
													39.4186	40
													19.5453	20
													-5.25	-10
													-8.9818	-10
													34.2759	30
													58.2708	60
													6.9488	10
													-5.9773	-10
													-24.6531	-20
													23.0998	20
													9.3944	10
													26.9082	30
													-14.5741	-10
													8.4115	10
													-9.4809	-10
													29.0991	30
													-7.4238	-10
													1.8518	0
													-3.3564	0
													23.4793	20
													12.1687	10
													-16.4837	-20
													-9.0538	-10
													-17.3142	-20
													13.7141	10
													10.2391	10
													-29.1083	-30
													-34.5368	-30
													2.792	0
													17.5439	20
													6.9761	10
													-27.2759	-30
													-27.436	-30
													20.9416	20
													0.6925	0
													-4.1248	0
													29.9241	30
													-12.3293	-10
													6.3088	10
													11.9561	10
													19.9976	20
													-13.4871	-10
													10.7464	10
													58.5693	60
													-26.6595	-30
													12.2796	10
													-0.9954	0
													-12.9417	-10
													-13.0397	-10
													13.558	10
													49.9125	50
													-12.2765	-10
													14.4192	10
													-7.5812	-10
													43.1313	40
													14.4932	10
													0.8419	0
													15.9975	20
													3.4883	0
													25.744	30
													-0.1118	0
													-18.8284	-20
													8.529	10
													34.8207	30
													-20.3324	-20
													-1.2469	0
													23.6966	20
													-34.8025	-30
													16.1089	20
													18.6592	20
													7.8697	10
													-11.8047	-10
													3.4573	0
													5.4637	10
													22.305	20
													16.8704	20
													-3.4047	0
													35.9975	40
													2.5833	0
													-12.6539	-10
													-5.1684	-10
													20.7722	20
													7.5043	10
													21.3772	20
													4.9844	0
													53.3364	50
													-29.7129	-30
													-4.7186	0
													1.9155	0
													5.385	10
													32.7229	30
													7.9891	10
													1.3025	0
													4.972	0
													18.6299	20
													-10.1885	-10
													12.6163	10
													-27.7005	-30
													2.0241	0
													-15.2358	-20
													-9.4572	-10
													9.2506	10
													-18.9016	-20
													-16.1795	-20
													-26.7172	-30
													-40.9702	-40
													0.5696	0
													26.8549	30
													-0.0387	0
													-1.0791	0
													-17.3347	-20
													35.2664	40
													-1.3883	0
													29.4804	30
													10.8396	10
													-1.6611	0
													25.2429	30
													23.2487	20
													1.3711	0
													29.519	30
													39.2259	40
													2.2877	0
													-1.5136	0
													11.6928	10
													10.6351	10
													19.7502	20
													-1.5118	0
													17.9023	20
													24.5719	20
													7.151	10
													6.666	10
													-21.4865	-20
													-19.856	-20
													-25.6288	-30
													-21.2858	-20
													0.498	0
													-28.6983	-30
													48.5213	50
													18.3856	20
													-37.7529	-40
													-19.491	-20
													1.4562	0
													-30.6576	-30
													-5.5979	-10
													25.42	30
													0.3224	0
													2.2552	0
													-16.4318	-20
													-7.5132	-10
													-23.4311	-20
													10.8842	10
													-5.4442	-10
													19.2673	20
													28.3447	30
													25.144	30
													2.9032	0
													-6.4797	-10
													-20.8804	-20
													5.9702	10
													22.7895	20
													-3.2186	0
													0.1336	0
													15.926	20
													20.8784	20
													-24.7383	-20
													7.599	10
													7.5165	10
													0.5774	0
													21.4557	20
													-3.6838	0
													-12.9238	-10
													9.1202	10
													12.7959	10
													-0.7501	0
													19.5225	20
													-26.7605	-30
													-17.8983	-20
													-57.8433	-60
													14.0281	10
													-16.2205	-20
													-1.4625	0
													23.7853	20
													4.6202	0
													-5.2087	-10
													-13.3694	-10
													-1.2074	0
													15.6586	20
													-26.7251	-30
													2.233	0
													19.2479	20
													-24.8145	-20
													16.9873	20
													17.2647	20
													-14.0427	-10
													-26.4902	-30
													12.2628	10
													19.7651	20
													15.1788	20
													18.857	20
													-20.0425	-20
													15.277	20
													-8.0002	-10
													-7.6273	-10
													-27.5179	-30
													25.6042	30
													7.1012	10
													23.6722	20
													33.8202	30
													-19.1448	-20
													16.4604	20
													3.3448	0
													21.8852	20
													25.7539	30
													20.0094	20
													-12.7522	-10
													1.0703	0
													8.8829	10
													66.7706	70
													28.1323	30
													50.0127	50
													11.89	10
													7.8366	10
													15.8633	20
													-6.9555	-10
													28.432	30
													0.4474	0
													-23.872	-20
													21.0168	20
													-27.7707	-30
													-33.2851	-30
													9.3682	10
													-15.4182	-20
													-14.6146	-10
													0.361	0
													-6.178	-10
													-0.8556	0
													9.0413	10
													-19.7706	-20
													-20.8847	-20
													-38.3896	-40
													-4.2049	0
													16.8856	20
													-10.4453	-10
													13.6266	10
													14.4063	10
													23.415	20
													23.3876	20
													-10.1768	-10
													-13.5368	-10
													4.5678	0
													-9.6971	-10
													32.6548	30
													31.1969	30
													5.5027	10
													-4.9425	0
													13.8162	10
													-9.5255	-10
													1.0997	0
													-7.0093	-10
													5.7117	10
													26.167	30
													18.4496	20
													26.4721	30
													-14.6943	-10
													7.196	10
													-16.067	-20
													11.2966	10
													10.114	10
													29.5262	30
													25.5846	30
													16.6645	20
													-6.5015	-10
													-5.9199	-10
													-37.4312	-40
													-5.3661	-10
													-27.4239	-30
													22.1965	20
													21.6388	20
													6.3657	10
													-3.9682	0
													6.4613	10
													35.7008	40
													30.5823	30
													-5.3688	-10
													6.9682	10
													-18.8099	-20
													11.6146	10
													18.3813	20
													21.6009	20
													-27.0244	-30
													13.6924	10
													-13.6843	-10
													-3.9311	0
													19.3602	20
													9.5641	10
													0.3252	0
													15.7347	20
													36.29	40
													-8.8699	-10
													-23.402	-20
													-19.6448	-20
													-15.2856	-20
													-9.8242	-10
													15.1336	20
													-38.1154	-40
													8.3193	10
													-11.9684	-10
													25.5912	30
													-13.5113	-10
													3.7512	0
													-15.1517	-20
													-10.0312	-10
													-1.6028	0
													-0.9759	0
													-6.8963	-10
													26.1664	30
													14.6028	10
													40.7029	40
													-1.946	0
													24.9326	20
													-38.3848	-40
													16.3697	20
													11.0293	10
													-3.8836	0
													17.507	20
													21.1526	20
													24.2721	20
													11.9958	10
													15.6214	20
													-9.8804	-10
													-18.3036	-20
													-1.7523	0
													7.331	10
													22.6189	20
													-12.2104	-10
													-6.1896	-10
													63.0895	60
													-8.8517	-10
													42.0061	40
													22.823	20
													-7.5561	-10
													1.4689	0
													-0.7032	0
													13.0698	10
													30.9128	30
													-29.1561	-30
													44.0746	40
													19.1558	20
													-7.378	-10
													1.0798	0
													9.5916	10
													9.5234	10
													27.6157	30
													25.4035	30
													-3.5741	0
													1.0014	0
													18.2748	20
													6.0066	10
													26.3266	30
													-10.1355	-10
													13.0337	10
													9.3668	10
													31.4371	30
													-23.31	-20
													3.6149	0
													4.6699	0
													-43.2381	-40
													28.5619	30
													59.7846	60
													-1.0437	0
													9.3406	10
													-5.6921	-10
													11.2864	10
													-3.9966	0
													1.5644	0
													35.963	40
													-13.3446	-10
													-7.9177	-10
													2.0817	0
													0.9506	0
													32.3862	30
													44.2253	40
													-15.964	-20
													-9.2205	-10
													14.0095	10
													-4.014	0
													43.457	40
													36.3174	40
													14.7804	10
													14.8728	10
													-3.1679	0
													18.8729	20
													26.1488	30
													6.4314	10
													42.1627	40
													17.0128	20
													1.3978	0
													11.0192	10
													25.5319	30
													-4.3633	0
													1.8907	0
													51.0657	50
													-5.8784	-10
													22.5268	20
													19.9632	20
													35.3794	40
													14.1202	10
													-45.704	-50
													-13.4506	-10
													13.8347	10
													8.7555	10
													42.8489	40
													31.7263	30
													13.5367	10
													5.2566	10
													-27.3696	-30
													40.8632	40
													6.2805	10
													-27.3201	-30
													12.2656	10
													5.6591	10
													-7.8069	-10
													13.4612	10
													-10.5503	-10
													-23.3605	-20
													-31.486	-30
													-3.6762	0
													-8.9419	-10
													12.403	10
													-26.4528	-30
													-0.5647	0
													-26.5025	-30
													39.7948	40
													1.2605	0
													28.1242	30
													13.4989	10
													21.7719	20
													-19.4844	-20
													28.7511	30
													32.6506	30
													-37.9362	-40
													0.0702	0
													-9.4416	-10
													6.7307	10
													-13.4045	-10
													9.1809	10
													15.5419	20
													8.4943	10
													1.2331	0
													-22.1882	-20
													4.7513	0
													-6.8187	-10
													-21.9805	-20
													2.4755	0
													-0.5936	0
													7.442	10
													23.4466	20
													15.1249	20
													29.7157	30
													-10.9861	-10
													-13.6915	-10
													1.7016	0
													31.2643	30
													29.6736	30
													1.0838	0
													-8.3375	-10
													-26.8129	-30
													17.0368	20
													4.0569	0
													-19.9558	-20
													-3.0916	0
													-32.9891	-30
													12.1998	10
													0.1201	0
													36.2248	40
													-23.5886	-20
													23.0101	20
													6.4728	10
													5.2521	10
													17.9333	20
													27.4697	30
													-17.8212	-20
													29.978	30
													-20.6001	-20
													-17.8823	-20
													-9.8512	-10
													18.3292	20
													-17.7992	-20
													10.2943	10
													11.8377	10
													6.6824	10
													14.6914	10
													-19.8569	-20
													23.7517	20
													5.8704	10
													18.201	20
													-16.0702	-20
													4.6406	0
													21.152	20
													23.8828	20
													1.913	0
													-33.4706	-30
													-18.3364	-20
													7.9726	10
													19.4849	20
													12.8625	10
													-8.6526	-10
													48.488	50
													5.047	10
													20.9103	20
													-4.7139	0
													-18.6988	-20
													17.305	20
													24.3535	20
													40.0442	40
													-6.9798	-10
													-28.9593	-30
													35.946	40
													8.8827	10
													-18.9429	-20
													-7.5835	-10
													-12.5769	-10
													26.8201	30
													15.4421	20
													8.455	10
													8.4095	10
													-12.83	-10
													23.4622	20
													10.5279	10
													-1.6227	0
													-0.0943	0
													1.5653	0
													-14.1409	-10
													18.4275	20
													31.4442	30
													53.078	50
													13.6784	10
													-12.8496	-10
													7.6196	10
													-16.5411	-20
													-8.6634	-10
													-9.5793	-10
													-13.0646	-10
													11.1636	10
													-18.7069	-20
													16.9448	20
													19.5067	20
													24.3498	20
													3.1914	0
													15.9791	20
													39.6613	40
													4.6599	0
													0.0422	0
													39.0497	40
													-46.5761	-50
													-5.5318	-10
													52.2076	50
													-5.8291	-10
													-7.6066	-10
													-20.9293	-20
													19.459	20
													-38.5988	-40
													-12.3879	-10
													14.9395	10
													3.5711	0
													16.0785	20
													6.1288	10
													17.2174	20
													-22.1483	-20
													7.9617	10
													-27.7313	-30
													19.2656	20
													-2.6114	0
													16.7065	20
													-7.1493	-10
													10.1729	10
													24.6814	20
													-35.994	-40
													-33.7478	-30
													-33.0471	-30
													20.5718	20
													11.7037	10
													-10.4491	-10
													33.5809	30
													6.3559	10
													-28.1364	-30
													-16.7829	-20
													-24.1047	-20
													22.6977	20
													-8.4224	-10
													-19.8378	-20
													-7.9422	-10
													-13.1286	-10
													20.6594	20
													13.1466	10
													9.6464	10
													11.9155	10
													4.4595	0
													-15.3771	-20
													14.4322	10
													-12.8226	-10
													-17.8381	-20
													-17.8818	-20
													20.9911	20
													23.221	20
													-31.5765	-30
													0.6381	0
													8.6388	10
													-8.6077	-10
													18.8196	20
													8.6886	10
													0.5433	0
													-7.5482	-10
													17.1404	20
													20.5859	20
													12.9861	10
													-1.1956	0
													22.0197	20
													-14.5376	-10
													6.4888	10
													31.5282	30
													-0.194	0
													-13.2767	-10
													42.4688	40
													-1.3384	0
													12.4324	10
													-12.4722	-10
													9.3522	10
													12.9404	10
													3.6912	0
													10.1218	10
													27.6917	30
													-24.4823	-20
													7.7113	10
													-36.2239	-40
													4.1682	0
													42.2103	40
													22.4227	20
													3.4615	0
													-3.1648	0
													14.1653	10
													24.738	20
													3.8948	0
													35.8952	40
													-12.7171	-10
													-36.3552	-40
													-11.3638	-10
													-0.3861	0
													-3.8552	0
													-13.3474	-10
													30.3448	30
													-28.7263	-30
													-6.2364	-10
													-15.786	-20
													-5.8822	-10
													-9.7233	-10
													13.1675	10
													-17.2212	-20
													-12.8132	-10
													5.6226	10
													25.2797	30
													-33.4905	-30
													39.5951	40
													-13.9675	-10
													16.5547	20
													24.5913	20
													30.0619	30
													-6.7472	-10
													4.0863	0
													0.3527	0
													-8.5132	-10
													9.0342	10
													10.7729	10
													-3.4463	0
													6.2472	10
													57.0716	60
													3.4487	0
													17.8061	20
													-5.6508	-10
													-6.9576	-10
													-3.3157	0
													14.8912	10
													-12.4308	-10
													-33.4589	-30
													4.6643	0
													-5.1283	-10
													9.2001	10
													5.2921	10
													18.1824	20
													21.6151	20
													-22.9128	-20
													-26.8916	-30
													13.6487	10
													9.7278	10
													-15.1832	-20
													28.348	30
													4.2602	0
													6.0714	10
													9.0788	10
													18.6833	20
													34.09	30
													-1.6395	0
													-31.0137	-30
													23.8693	20
													-14.9547	-10
													28.4736	30
													-8.1898	-10
													33.4296	30
													-12.5196	-10
													-18.652	-20
													22.7388	20
													-23.661	-20
													17.2117	20
													12.3565	10
													0.7346	0
													-3.2307	0
													44.7562	40
													-3.8907	0
													-0.2041	0
													-15.1746	-20
													-12.6692	-10
													-8.0724	-10
													37.7905	40
													-4.2084	0
													-10.2013	-10
													-5.3644	-10
													17.8875	20
													-22.7146	-20
													16.1424	20
													-23.0259	-20
													0.983	0
													-32.9379	-30
													14.3184	10
													17.4573	20
													-10.151	-10
													9.9515	10
													6.8568	10
													26.7823	30
													6.1678	10
													24.3892	20
													1.2646	0
													-9.3659	-10
													2.8404	0
													-0.3865	0
													21.2334	20
													2.4771	0
													-13.2248	-10
													0.5031	0
													27.3719	30
													-4.6981	0
													-9.5723	-10
													23.2798	20
													5.6245	10
													-3.6541	0
													-11.1766	-10
													-25.9968	-30
													6.6674	10
													-2.7403	0
													9.9784	10
													-25.5309	-30
													30.0367	30
													13.3441	10
													-27.7325	-30
													24.7412	20
													-8.1516	-10
													9.6444	10
													7.9892	10
													-13.964	-10
													-53.628	-50
													14.3111	10
													-3.2407	0
													-8.3572	-10
													11.9783	10
													-10.1936	-10
													17.0238	20
													6.6179	10
													-16.2264	-20
													20.3366	20
													13.0902	10
													28.6433	30
													-14.2525	-10
													-14.3055	-10
													9.8665	10
													16.9407	20
													20.1623	20
													3.7302	0
													-1.1178	0
													16.6564	20
													42.8907	40
													21.2917	20
													5.2907	10
													-7.8903	-10
													13.595	10
													-6.0821	-10
													8.3689	10
													19.165	20
													22.0855	20
													15.3628	20
													31.1587	30
													40.6241	40
													-34.3533	-30
													-31.9737	-30
													-14.8528	-10
													-36.3585	-40
													-3.542	0
													-3.128	0
													8.6085	10
													9.3232	10
													-10.1234	-10
													-12.6663	-10
													19.4681	20
													-4.0389	0
													-23.8241	-20
													3.8061	0
													7.6826	10
													-4.6205	0
													16.8712	20
													8.1156	10
													-0.6569	0
													2.7193	0
													12.7636	10

## Sheet: Second run
	True mean:	3.6
	SD	20
	5 data points			10 data points			20 data points			100 data points			1000 data points
	Fine	Coarse		Fine	Coarse		Fine	Coarse		Fine	Coarse		Fine	Coarse
Mean	6.89392	8		10.643	10		3.26581	2.5		2.78161	2.6		4.0479	4.06
SD	14.301	14.8324		24.3181	24.4949		14.2997	14.8235		18.9229	19.4687		19.7534	19.8472
	-14.6364	-10		40.7856	40		-5.2283	-10		-25.7879	-30		-3.8614	0
	4.5887	0		22.1414	20		-17.4989	-20		7.4436	10		19.9098	20
	25.1609	30		-20.9393	-20		0.4883	0		-12.8459	-10		19.5777	20
	9.7636	10		-2.9448	0		6.183	10		1.7152	0		6.0041	10
	9.5928	10		21.4329	20		13.7886	10		10.3243	10		15.025	20
				9.3637	10		2.9975	0		-14.4931	-10		11.8559	10
				48.9039	50		-5.5473	-10		-2.1651	0		-16.1392	-20
				2.6422	0		15.5267	20		10.6013	10		18.7914	20
				-27.4373	-30		1.3294	0		-33.1172	-30		-9.544	-10
				12.4817	10		19.7405	20		24.3195	20		-8.4784	-10
							1.8039	0		52.0892	50		7.1389	10
							3.4742	0		22.788	20		-2.5501	0
							1.7628	0		-2.7154	0		0.9636	0
							-14.8248	-10		12.1725	10		15.5072	20
							-14.939	-10		-17.1197	-20		24.5367	20
							-15.6244	-20		41.1573	40		-0.3592	0
							39.2966	40		22.4141	20		10.1536	10
							-0.4038	0		19.3469	20		-1.166	0
							22.4082	20		-13.9175	-10		8.1919	10
							10.5831	10		9.999	10		12.4	10
										-7.5659	-10		-8.7373	-10
										-2.6286	0		9.0967	10
										-7.8002	-10		15.622	20
										-16.9147	-20		5.4462	10
										-14.5749	-10		38.1968	40
										-0.5979	0		-8.5711	-10
										-30.3773	-30		-11.1412	-10
										15.752	20		-31.3976	-30
										1.244	0		21.8097	20
										17.5832	20		20.9417	20
										8.993	10		2.0021	0
										13.4857	10		21.5695	20
										-26.0624	-30		7.2741	10
										-16.8053	-20		9.4158	10
										-5.3399	-10		5.8589	10
										5.7932	10		12.399	10
										26.1747	30		5.6332	10
										-2.1993	0		59.3467	60
										28.831	30		-19.7333	-20
										13.1085	10		-33.486	-30
										27.0823	30		-19.2136	-20
										6.1389	10		-18.2669	-20
										-9.5363	-10		-5.0722	-10
										-26.028	-30		0.2306	0
										6.7098	10		-0.7707	0
										19.971	20		14.4267	10
										-2.2518	0		11.3853	10
										-7.2157	-10		18.6246	20
										-2.5728	0		39.1651	40
										-18.3319	-20		28.0613	30
										-6.2602	-10		-22.0651	-20
										-0.0148	0		-42.9791	-40
										4.5168	0		21.6386	20
										2.3243	0		-33.1128	-30
										15.8267	20		4.9351	0
										5.7864	10		4.3096	0
										39.8803	40		48.1434	50
										9.8405	10		2.2157	0
										39.6899	40		-6.5465	-10
										-10.8624	-10		8.3162	10
										14.1309	10		8.5161	10
										-1.605	0		5.0009	10
										15.6029	20		-8.5716	-10
										15.4786	20		-20.8519	-20
										-40.1204	-40		9.93	10
										-22.9409	-20		-23.2574	-20
										-25.2203	-30		-17.0437	-20
										11.6369	10		30.2243	30
										33.004	30		-4.7781	0
										-2.9363	0		0.7936	0
										19.8465	20		21.5964	20
										14.5108	10		-2.4022	0
										-17.4326	-20		24.1873	20
										11.5493	10		-3.3013	0
										-11.4379	-10		23.856	20
										33.9253	30		16.1867	20
										2.9487	0		-0.6603	0
										36.32	40		-13.7139	-10
										-4.9012	0		-17.2622	-20
										15.3887	20		-1.8014	0
										2.3442	0		-5.1628	-10
										-36.8392	-40		-4.5735	0
										-16.0426	-20		23.2709	20
										15.8502	20		-2.3539	0
										2.5023	0		26.4736	30
										-18.7746	-20		-7.0324	-10
										-8.9276	-10		23.0513	20
										8.5904	10		-6.845	-10
										-16.2604	-20		7.1316	10
										23.099	20		23.0148	20
										-9.2142	-10		-4.6794	0
										39.7773	40		-5.1654	-10
										-17.9973	-20		43.6678	40
										7.5838	10		22.6199	20
										-26.8205	-30		-5.0401	-10
										-10.8726	-10		16.5788	20
										-8.265	-10		-3.6015	0
										11.6267	10		17.7177	20
										22.4427	20		31.917	30
										9.6097	10		-28.4903	-30
													24.1771	20
													32.7594	30
													4.5494	0
													38.5251	40
													6.7078	10
													-21.1424	-20
													-40.2699	-40
													-3.0681	0
													17.8709	20
													9.9482	10
													11.8722	10
													-7.9417	-10
													6.48	10
													-29.1733	-30
													-11.6018	-10
													-12.7759	-10
													13.9946	10
													3.3168	0
													-19.5106	-20
													3.4095	0
													-10.1962	-10
													-9.734	-10
													20.883	20
													5.8684	10
													11.5673	10
													21.2794	20
													7.2052	10
													14.6171	10
													17.2593	20
													27.0122	30
													13.1172	10
													31.8447	30
													4.0522	0
													2.6426	0
													37.6267	40
													-6.5942	-10
													3.5429	0
													21.9973	20
													6.5962	10
													31.6987	30
													24.2824	20
													9.4314	10
													-11.954	-10
													14.9339	10
													-24.0524	-20
													8.4895	10
													19.7688	20
													7.8608	10
													21.1935	20
													44.3775	40
													22.0786	20
													8.9383	10
													16.4332	20
													12.1097	10
													-22.6945	-20
													-4.7282	0
													28.0938	30
													2.7283	0
													15.2485	20
													-16.53	-20
													4.8903	0
													15.6058	20
													-23.6303	-20
													10.5519	10
													-0.0369	0
													-15.1907	-20
													2.8493	0
													-34.3261	-30
													-38.9595	-40
													-19.9385	-20
													-16.2106	-20
													-19.8606	-20
													-30.9086	-30
													9.3646	10
													-28.2837	-30
													5.8044	10
													19.3413	20
													3.5555	0
													5.4622	10
													-3.9631	0
													-26.0535	-30
													2.7236	0
													22.8165	20
													38.3649	40
													-5.0041	-10
													-28.9465	-30
													6.9269	10
													11.1253	10
													-0.939	0
													-19.3782	-20
													44.0867	40
													-43.5905	-40
													-6.5994	-10
													-22.8325	-20
													-9.1226	-10
													9.957	10
													6.361	10
													-10.6147	-10
													19.1401	20
													16.0479	20
													16.5476	20
													-4.9126	0
													24.5716	20
													16.8141	20
													53.7754	50
													24.8692	20
													26.7384	30
													4.6596	0
													-22.1677	-20
													-3.8244	0
													-11.5558	-10
													-7.6794	-10
													14.7028	10
													-7.5356	-10
													-14.3023	-10
													-4.5866	0
													0.3823	0
													11.7867	10
													-15.4527	-20
													9.9463	10
													5.1604	10
													30.0877	30
													-0.6634	0
													0.9104	0
													-19.8271	-20
													-24.1053	-20
													9.8102	10
													-1.3898	0
													13.6749	10
													-14.2532	-10
													41.7702	40
													6.0446	10
													24.5407	20
													-0.9384	0
													0.35	0
													17.401	20
													14.7151	10
													-18.8051	-20
													-27.0539	-30
													-18.3574	-20
													-24.7155	-20
													4.7914	0
													-4.625	0
													-3.7602	0
													-23.6193	-20
													19.1913	20
													12.3882	10
													1.8076	0
													24.0236	20
													-13.8796	-10
													11.894	10
													10.5688	10
													10.5851	10
													-10.9849	-10
													10.1368	10
													-6.6976	-10
													-14.3289	-10
													-20.4654	-20
													24.3563	20
													-13.3189	-10
													0.1417	0
													-20.573	-20
													-2.3425	0
													-61.0408	-60
													-18.1392	-20
													-24.9287	-20
													-16.689	-20
													-0.6653	0
													-2.907	0
													42.488	40
													-7.8355	-10
													-1.4006	0
													-27.7863	-30
													-5.9477	-10
													-23.1595	-20
													4.206	0
													20.6617	20
													11.6851	10
													-10.4124	-10
													-29.0109	-30
													32.8003	30
													44.6009	40
													6.01	10
													-16.198	-20
													27.5554	30
													-8.2531	-10
													-5.7962	-10
													21.3275	20
													-24.1044	-20
													-35.5351	-40
													12.0137	10
													11.6148	10
													5.5028	10
													13.5337	10
													25.2448	30
													23.009	20
													-7.7714	-10
													19.7994	20
													7.0649	10
													-6.5109	-10
													-20.2661	-20
													16.5394	20
													-3.4725	0
													4.5287	0
													-12.259	-10
													-27.4103	-30
													7.0317	10
													2.3572	0
													27.5806	30
													19.6341	20
													24.6661	20
													-11.3775	-10
													-15.1265	-20
													-21.7817	-20
													13.5596	10
													59.3816	60
													18.1514	20
													-11.8613	-10
													20.3327	20
													-18.9666	-20
													-24.8894	-20
													17.9488	20
													-11.9581	-10
													9.9197	10
													31.7307	30
													11.6225	10
													22.1932	20
													-28.516	-30
													16.8307	20
													46.37	50
													14.4228	10
													-27.2175	-30
													-0.4629	0
													-6.3993	-10
													11.2605	10
													11.8407	10
													11.7099	10
													-3.6756	0
													-8.3854	-10
													-8.1918	-10
													20.6708	20
													-33.4602	-30
													-0.5461	0
													9.0076	10
													-9.4554	-10
													13.1445	10
													2.1736	0
													-15.166	-20
													6.8273	10
													-1.7637	0
													-4.5975	0
													-10.6265	-10
													4.8289	0
													-33.3226	-30
													-4.3667	0
													-7.271	-10
													-14.638	-10
													16.654	20
													-11.0854	-10
													14.4127	10
													23.1168	20
													0.4626	0
													9.156	10
													16.3903	20
													1.9804	0
													14.4174	10
													-21.6513	-20
													25.8085	30
													-16.1913	-20
													-32.9767	-30
													31.29	30
													2.3455	0
													12.5784	10
													-3.6652	0
													-16.8117	-20
													-57.8598	-60
													16.1256	20
													-2.1337	0
													-0.3469	0
													11.7121	10
													-24.787	-20
													-10.9889	-10
													26.5466	30
													15.5573	20
													-22.0256	-20
													-40.4653	-40
													-7.8249	-10
													7.8799	10
													22.4475	20
													5.4745	10
													-18.8462	-20
													9.7232	10
													-19.8467	-20
													-15.6193	-20
													-9.4747	-10
													-20.9879	-20
													-1.8193	0
													-14.399	-10
													-2.1137	0
													-5.6484	-10
													-4.5957	0
													-6.4708	-10
													28.2659	30
													15.8061	20
													4.7814	0
													-25.7389	-30
													-28.9161	-30
													-35.695	-40
													55.7039	60
													23.0475	20
													8.7396	10
													-15.8848	-20
													-19.3273	-20
													14.5528	10
													34.9017	30
													-30.2669	-30
													-5.3879	-10
													1.9142	0
													-36.2399	-40
													20.4249	20
													-4.6932	0
													41.8436	40
													-4.218	0
													11.7836	10
													-19.2486	-20
													-8.8973	-10
													-19.7745	-20
													11.4515	10
													29.6368	30
													-8.2728	-10
													12.3275	10
													-6.4872	-10
													5.6422	10
													27.525	30
													6.0057	10
													-17.1369	-20
													-13.5421	-10
													0.2025	0
													-0.2334	0
													-13.7163	-10
													7.2133	10
													28.9306	30
													-1.4234	0
													-0.4914	0
													-40.4304	-40
													-11.8903	-10
													-24.2655	-20
													-4.1247	0
													14.1117	10
													34.0654	30
													39.5699	40
													1.2623	0
													-2.8039	0
													19.9503	20
													13.4032	10
													18.905	20
													19.1656	20
													-26.0061	-30
													14.4073	10
													1.7692	0
													-11.605	-10
													-10.2719	-10
													29.2292	30
													-12.5948	-10
													-21.1364	-20
													7.8937	10
													43.8154	40
													4.1111	0
													9.766	10
													-15.1649	-20
													37.0843	40
													6.0998	10
													14.202	10
													-15.4414	-20
													20.6809	20
													11.3829	10
													-19.52	-20
													4.3948	0
													-5.412	-10
													5.785	10
													-1.4111	0
													-0.198	0
													-17.0583	-20
													-2.8658	0
													18.9305	20
													38.4935	40
													-19.6104	-20
													51.1482	50
													34.1216	30
													6.9702	10
													-2.4241	0
													-10.3731	-10
													20.2554	20
													-10.2921	-10
													-5.6377	-10
													21.2723	20
													12.3189	10
													21.5349	20
													13.6946	10
													-4.4179	0
													-6.677	-10
													19.5274	20
													-9.8238	-10
													27.3332	30
													19.414	20
													9.3544	10
													3.6645	0
													10.9123	10
													74.1336	70
													1.3513	0
													-27.5319	-30
													41.902	40
													15.7969	20
													-9.3582	-10
													55.9467	60
													14.619	10
													9.4841	10
													-11.9569	-10
													-17.6986	-20
													-31.7683	-30
													-4.8584	0
													-17.462	-20
													16.5551	20
													-2.7526	0
													38.9798	40
													33.8116	30
													6.8802	10
													-2.0553	0
													26.6433	30
													-19.3302	-20
													17.074	20
													-9.7823	-10
													-4.4065	0
													-9.836	-10
													15.1126	20
													-11.9619	-10
													-17.6712	-20
													14.6596	10
													-4.8686	0
													10.8317	10
													-3.4378	0
													8.9908	10
													-47.689	-50
													12.9173	10
													40.6712	40
													24.3858	20
													21.8179	20
													-1.1946	0
													7.22	10
													8.485	10
													5.5279	10
													-13.0094	-10
													-3.445	0
													0.1045	0
													-6.0131	-10
													20.3367	20
													54.367	50
													-22.8667	-20
													6.1668	10
													-25.2476	-30
													29.6502	30
													31.7982	30
													-29.6509	-30
													42.4737	40
													-18.094	-20
													8.1364	10
													25.5786	30
													6.5438	10
													49.5133	50
													58.6512	60
													6.3664	10
													-34.5413	-30
													-3.6999	0
													-13.3622	-10
													-11.6951	-10
													-18.9539	-20
													5.1638	10
													45.7326	50
													-10.7169	-10
													-2.0103	0
													26.9295	30
													27.8564	30
													13.3108	10
													24.1203	20
													21.0145	20
													-4.0352	0
													12.1779	10
													-2.3826	0
													-14.3974	-10
													16.2949	20
													4.9491	0
													-0.1424	0
													9.4345	10
													23.3539	20
													11.4587	10
													7.491	10
													9.1957	10
													4.6244	0
													-11.8893	-10
													19.3356	20
													31.7781	30
													-7.082	-10
													42.1552	40
													0.075	0
													-1.275	0
													-14.352	-10
													-12.2467	-10
													-15.4595	-20
													10.6781	10
													35.5405	40
													14.1494	10
													20.684	20
													30.4369	30
													-46.3907	-50
													0.2488	0
													10.6603	10
													17.9451	20
													-22.497	-20
													-16.5174	-20
													19.4137	20
													1.2686	0
													14.6618	10
													-15.6129	-20
													-29.076	-30
													18.824	20
													27.4661	30
													36.2411	40
													-27.0438	-30
													-23.137	-20
													-25.8769	-30
													2.7667	0
													-8.7101	-10
													29.8831	30
													-25.5013	-30
													-31.247	-30
													7.7061	10
													27.4586	30
													-12.4565	-10
													-21.7127	-20
													0.6134	0
													-29.1289	-30
													3.9469	0
													20.1677	20
													7.9548	10
													-34.5849	-30
													-7.1364	-10
													-2.4406	0
													39.8716	40
													21.897	20
													2.4584	0
													29.7872	30
													-17.2947	-20
													-3.3653	0
													31.8512	30
													33.6477	30
													18.2075	20
													13.415	10
													-8.1225	-10
													18.498	20
													-12.9631	-10
													15.0904	20
													9.2368	10
													26.3861	30
													-4.9174	0
													16.3228	20
													19.4636	20
													-14.3675	-10
													6.7249	10
													35.5451	40
													5.8488	10
													-2.5725	0
													12.7332	10
													-1.902	0
													12.4629	10
													0.9047	0
													3.2334	0
													12.8158	10
													30.8463	30
													12.6375	10
													36.5677	40
													-36.9672	-40
													-5.3851	-10
													8.3199	10
													-13.1035	-10
													-21.9191	-20
													15.9407	20
													15.854	20
													9.3876	10
													11.5063	10
													-13.8113	-10
													-6.3538	-10
													1.4666	0
													-10.1566	-10
													10.2376	10
													50.9045	50
													-6.0446	-10
													16.549	20
													-17.0885	-20
													30.3911	30
													-15.7828	-20
													7.7743	10
													-8.7719	-10
													13.8403	10
													3.8271	0
													2.7202	0
													62.5819	60
													-9.0009	-10
													2.6624	0
													57.2605	60
													-19.3338	-20
													14.66	10
													-17.9292	-20
													24.2128	20
													10.1506	10
													16.6425	20
													-1.9772	0
													8.5038	10
													33.0503	30
													-41.902	-40
													-29.0658	-30
													11.9094	10
													-9.4954	-10
													-2.327	0
													-26.3384	-30
													-14.4967	-10
													-4.4836	0
													-10.916	-10
													-13.7297	-10
													-4.8369	0
													-15.2533	-20
													30.4377	30
													-16.1687	-20
													39.9589	40
													-3.8887	0
													-25.4348	-30
													-8.7736	-10
													22.29	20
													24.7186	20
													6.8045	10
													9.348	10
													16.2581	20
													-25.5808	-30
													-8.0342	-10
													-33.003	-30
													-5.3821	-10
													22.5855	20
													17.9488	20
													49.3566	50
													6.9346	10
													-39.5298	-40
													37.388	40
													29.2456	30
													-8.0526	-10
													8.0523	10
													19.189	20
													11.2941	10
													17.5273	20
													1.3457	0
													2.8235	0
													5.3618	10
													-12.1931	-10
													32.0592	30
													3.7266	0
													17.3296	20
													-13.4987	-10
													-17.9047	-20
													1.7807	0
													-1.4554	0
													27.4965	30
													15.7213	20
													14.4103	10
													-25.2988	-30
													-15.7539	-20
													7.641	10
													-3.3576	0
													29.4018	30
													30.4231	30
													-8.016	-10
													21.1027	20
													31.509	30
													10.0197	10
													36.0676	40
													24.8487	20
													7.8821	10
													21.1361	20
													7.4881	10
													-4.6978	0
													10.7692	10
													4.3245	0
													-3.6926	0
													39.0204	40
													8.0255	10
													58.2076	60
													-2.3233	0
													14.8859	10
													35.2524	40
													58.1846	60
													9.6713	10
													-12.2052	-10
													19.6676	20
													-22.7981	-20
													-1.8769	0
													9.0373	10
													33.3911	30
													32.3428	30
													3.0488	0
													22.0786	20
													-2.8256	0
													16.8225	20
													41.9059	40
													6.7352	10
													-2.4107	0
													-6.4007	-10
													17.9294	20
													30.3458	30
													46.1136	50
													4.6809	0
													6.8607	10
													-9.0541	-10
													35.8398	40
													2.091	0
													-5.8647	-10
													47.2848	50
													19.7976	20
													17.9269	20
													-16.5114	-20
													12.2797	10
													14.0029	10
													-18.2449	-20
													-0.9159	0
													-4.4984	0
													14.1572	10
													-16.5393	-20
													25.3805	30
													39.2975	40
													-2.4751	0
													3.4261	0
													13.7327	10
													27.665	30
													14.0404	10
													11.5409	10
													-6.0562	-10
													-1.0299	0
													15.8677	20
													37.257	40
													14.9679	10
													-20.5206	-20
													12.2612	10
													1.7576	0
													-1.2811	0
													-0.7838	0
													-13.9953	-10
													-2.8161	0
													-12.0883	-10
													-3.6993	0
													5.9454	10
													7.0868	10
													-0.7131	0
													0.5478	0
													4.2738	0
													12.7656	10
													29.2326	30
													16.0018	20
													-2.1335	0
													15.5603	20
													-1.3107	0
													-32.0147	-30
													-43.3448	-40
													-30.6719	-30
													-1.1425	0
													-8.7925	-10
													-10.8032	-10
													4.4131	0
													-9.5796	-10
													-9.0103	-10
													15.7925	20
													19.2467	20
													52.3317	50
													9.6481	10
													4.7664	0
													-7.8827	-10
													-0.3042	0
													2.5894	0
													-31.5155	-30
													-1.5472	0
													18.5908	20
													-7.8153	-10
													13.4847	10
													23.4288	20
													25.1428	30
													19.1368	20
													-41.5968	-40
													-7.6875	-10
													21.6298	20
													11.4935	10
													3.6971	0
													12.3384	10
													26.2015	30
													6.6754	10
													-11.5725	-10
													-0.0033	0
													-0.5558	0
													21.5349	20
													11.8462	10
													14.5504	10
													6.5567	10
													-3.6453	0
													4.8228	0
													7.9341	10
													-24.3624	-20
													7.1774	10
													22.1517	20
													1.3964	0
													35.048	40
													14.8098	10
													-4.8069	0
													0.5211	0
													-1.904	0
													8.4224	10
													18.6937	20
													-2.2382	0
													12.7689	10
													38.7058	40
													22.2298	20
													20.1053	20
													-12.6961	-10
													-7.0841	-10
													8.451	10
													1.587	0
													-28.901	-30
													-26.6885	-30
													24.1238	20
													-11.5625	-10
													45.1669	50
													-40.8397	-40
													12.5753	10
													3.6125	0
													-11.5248	-10
													11.6865	10
													-12.2771	-10
													20.7957	20
													4.9374	0
													-29.1877	-30
													-44.895	-40
													-2.0766	0
													26.5161	30
													7.2234	10
													4.685	0
													17.3551	20
													-24.2681	-20
													32.1073	30
													-14.277	-10
													4.3553	0
													-3.6714	0
													6.5911	10
													-35.2904	-40
													34.0779	30
													14.5162	10
													43.7985	40
													31.9334	30
													3.8296	0
													-15.181	-20
													-31.1782	-30
													3.9394	0
													7.9832	10
													24.5164	20
													-15.4197	-20
													19.4959	20
													5.0286	10
													-11.8737	-10
													19.0832	20
													8.9131	10
													-1.1021	0
													41.1458	40
													15.7848	20
													1.3945	0
													9.1491	10
													5.3409	10
													7.0719	10
													12.6718	10
													-8.4704	-10
													-12.3405	-10
													10.813	10
													41.3018	40
													-2.5364	0
													-16.6545	-20
													-1.1709	0
													-6.0803	-10
													-2.9469	0
													13.1104	10
													0.9999	0
													-8.2871	-10
													-5.2753	-10
													-22.8506	-20
													-13.5904	-10
													-24.66	-20
													-6.7197	-10
													-18.102	-20
													-10.5432	-10
													-2.4331	0

## Sheet: Thrid run
	True mean:	3.6
	SD	20
	5 data points			10 data points			20 data points			100 data points			1000 data points
	Fine	Coarse		Fine	Coarse		Fine	Coarse		Fine	Coarse		Fine	Coarse
Mean	-2.76826	-2		4.68405	4		6.35055	7		7.14095	7.1		4.37124	4.3
SD	25.6588	25.8844		9.21387	8.43274		22.9253	22.5015		20.5344	20.4641		19.5449	19.7307
	-29.988	-30		-8.687	-10		12.3504	10		1.5709	0		16.5434	20
	19.3795	20		8.4339	10		-13.1535	-10		-24.9821	-20		16.251	20
	-9.4856	-10		14.587	10		-22.5501	-20		-11.6882	-10		41.6655	40
	28.4981	30		12.9527	10		19.4829	20		11.8028	10		-19.6005	-20
	-22.2453	-20		7.4291	10		-0.3453	0		-12.1987	-10		-3.3462	0
				-0.9961	0		16.5831	20		6.8327	10		-30.3013	-30
				-7.9843	-10		-13.0295	-10		43.1581	40		21.9877	20
				13.2096	10		21.5191	20		19.5053	20		4.0306	0
				-4.1367	0		-32.6697	-30		24.3473	20		-2.3868	0
				12.0323	10		34.9337	30		50.8066	50		-30.8203	-30
							20.53	20		27.1079	30		7.2686	10
							5.8031	10		11.5548	10		-1.5946	0
							-19.622	-20		42.625	40		-23.4958	-20
							-4.3507	0		-14.4931	-10		-19.5488	-20
							8.6859	10		-10.043	-10		-11.6397	-10
							27.7558	30		43.9658	40		-1.406	0
							-17.0708	-20		12.6869	10		-29.3753	-30
							29.5029	30		2.7579	0		-0.0398	0
							58.9625	60		12.7633	10		15.9137	20
							-6.3069	-10		-1.6829	0		-3.9335	0
										-2.2397	0		-10.3607	-10
										-4.136	0		9.6824	10
										-7.4799	-10		25.6216	30
										-15.2746	-20		-5.3322	-10
										2.403	0		-5.7342	-10
										-7.8937	-10		-25.1164	-30
										32.4371	30		-15.9543	-20
										8.3105	10		15.7179	20
										24.0275	20		1.3269	0
										0.8034	0		18.8912	20
										1.969	0		16.9979	20
										28.7649	30		11.1157	10
										32.9707	30		18.9331	20
										4.2588	0		34.0694	30
										37.4496	40		15.1365	20
										13.1146	10		12.1195	10
										10.9706	10		2.7414	0
										47.44	50		-21.2453	-20
										34.3137	30		-6.499	-10
										21.7452	20		10.117	10
										11.6452	10		-18.6285	-20
										-7.1676	-10		12.9637	10
										1.2957	0		10.0523	10
										40.04	40		5.6004	10
										-36.8301	-40		9.6287	10
										-9.1395	-10		4.0765	0
										-0.1761	0		3.1589	0
										6.5655	10		3.4248	0
										-32.0776	-30		22.1891	20
										14.1814	10		1.7914	0
										18.1946	20		-49.2229	-50
										-15.2027	-20		-6.123	-10
										-1.5857	0		7.5194	10
										-20.6709	-20		22.7944	20
										36.091	40		31.2065	30
										11.0702	10		-15.2293	-20
										-1.4178	0		18.8174	20
										-14.9091	-10		8.3584	10
										5.5732	10		-0.5675	0
										37.2856	40		4.0948	0
										9.1052	10		3.0382	0
										10.6658	10		6.4072	10
										-20.4075	-20		8.3517	10
										6.9226	10		-9.831	-10
										19.1232	20		-17.3	-20
										-24.0287	-20		22.9153	20
										26.1656	30		-0.7951	0
										52.9088	50		31.8907	30
										-27.5583	-30		-14.8837	-10
										-37.733	-40		-8.2828	-10
										2.148	0		32.0255	30
										18.7822	20		31.7522	30
										1.9667	0		-16.98	-20
										0.4305	0		7.7302	10
										3.73	0		30.4222	30
										-17.6922	-20		30.2543	30
										-29.2783	-30		-22.0979	-20
										35.231	40		35.9675	40
										9.4523	10		16.8329	20
										-20.1522	-20		8.1469	10
										25.1187	30		-0.9115	0
										-22.3474	-20		-15.7199	-20
										1.1646	0		5.5004	10
										18.4154	20		-1.5347	0
										-13.2144	-10		49.8026	50
										-3.3894	0		7.4012	10
										4.1926	0		0.1319	0
										42.6475	40		3.3194	0
										12.7805	10		-8.6548	-10
										-4.3862	0		45.036	50
										-0.9077	0		16.3405	20
										-2.0057	0		5.0979	10
										29.7345	30		26.0653	30
										-2.0875	0		2.9374	0
										-12.2342	-10		1.645	0
										8.4124	10		-7.5324	-10
										1.7071	0		-8.71	-10
										19.4647	20		35.6911	40
										22.7888	20		18.9699	20
										25.3421	30		5.3387	10
													37.6872	40
													4.0727	0
													9.4009	10
													-24.798	-20
													13.1055	10
													-25.3464	-30
													-16.1656	-20
													22.5876	20
													10.6245	10
													-13.8456	-10
													-4.3625	0
													8.7287	10
													8.0005	10
													-30.6288	-30
													-20.5151	-20
													-31.8583	-30
													2.1502	0
													-30.8223	-30
													17.6376	20
													-16.5094	-20
													-18.5285	-20
													39.4112	40
													46.8477	50
													-12.7856	-10
													2.859	0
													42.8601	40
													-7.2053	-10
													37.9501	40
													19.9962	20
													4.7104	0
													-3.4625	0
													37.463	40
													17.821	20
													-9.0553	-10
													11.4545	10
													-13.9592	-10
													6.5789	10
													34.2376	30
													14.237	10
													-11.5933	-10
													10.5597	10
													-10.3561	-10
													43.9863	40
													-32.274	-30
													-9.5902	-10
													19.0291	20
													-12.8068	-10
													3.9578	0
													16.6907	20
													28.754	30
													-14.9416	-10
													0.2024	0
													-5.8334	-10
													1.3153	0
													10.9897	10
													-8.7723	-10
													19.6023	20
													12.1339	10
													-5.8466	-10
													9.119	10
													23.2845	20
													23.4621	20
													16.9642	20
													2.3	0
													-8.802	-10
													8.0821	10
													-5.7227	-10
													-3.0417	0
													22.0963	20
													32.5405	30
													15.5166	20
													44.6654	40
													-26.985	-30
													4.0538	0
													5.5057	10
													35.8905	40
													13.6255	10
													-2.8768	0
													14.6843	10
													16.4489	20
													7.2525	10
													-36.9495	-40
													24.0616	20
													-66.2308	-70
													5.7898	10
													-27.4266	-30
													-3.5022	0
													31.5711	30
													-6.6695	-10
													41.9436	40
													19.1682	20
													-1.3291	0
													-14.4706	-10
													-6.318	-10
													11.0899	10
													-43.8106	-40
													15.9012	20
													9.1893	10
													19.9773	20
													44.5501	40
													-2.8749	0
													-16.0108	-20
													27.1927	30
													21.4917	20
													0.7414	0
													-8.2694	-10
													8.5783	10
													-18.9956	-20
													4.9219	0
													-9.1585	-10
													-12.7862	-10
													22.9591	20
													4.207	0
													30.6219	30
													-18.1275	-20
													8.4053	10
													-17.3236	-20
													15.9744	20
													29.7007	30
													24.0698	20
													-38.7076	-40
													17.2346	20
													3.7742	0
													10.2855	10
													-7.3483	-10
													-29.4197	-30
													21.4559	20
													-6.5411	-10
													-2.9958	0
													6.9671	10
													54.3348	50
													49.4725	50
													-22.7732	-20
													-5.8827	-10
													23.3476	20
													-37.8605	-40
													28.4805	30
													-2.7048	0
													31.5859	30
													-13.9976	-10
													-14.8494	-10
													49.8881	50
													15.3603	20
													-2.5954	0
													-17.0593	-20
													25.667	30
													10.4422	10
													-41.6799	-40
													-14.4657	-10
													63.0006	60
													3.3647	0
													-36.3908	-40
													-14.1603	-10
													-4.798	0
													17.4916	20
													0.3449	0
													5.6315	10
													3.2428	0
													-15.6065	-20
													27.0561	30
													-3.7055	0
													-5.6682	-10
													7.4998	10
													2.2611	0
													-6.8306	-10
													6.142	10
													45.8604	50
													14.4256	10
													-9.5017	-10
													-13.7906	-10
													-1.178	0
													-27.9197	-30
													40.115	40
													7.6853	10
													-19.6679	-20
													6.0122	10
													-25.2704	-30
													15.2469	20
													-0.0293	0
													4.4402	0
													10.8368	10
													20.6743	20
													-12.5954	-10
													-25.741	-30
													1.5221	0
													-12.8583	-10
													12.0996	10
													-33.4937	-30
													20.7715	20
													9.7279	10
													-18.6312	-20
													-2.7448	0
													20.3573	20
													52.1293	50
													-3.4218	0
													31.2392	30
													-13.6131	-10
													7.7378	10
													-0.5499	0
													10.4051	10
													-6.3622	-10
													-24.8279	-20
													-1.8155	0
													12.3933	10
													-6.5229	-10
													-0.087	0
													11.64	10
													14.3846	10
													-11.0719	-10
													-1.7674	0
													21.012	20
													10.2152	10
													-23.3579	-20
													34.5574	30
													-8.7327	-10
													-10.3714	-10
													-24.8719	-20
													1.4074	0
													1.5458	0
													-2.8543	0
													-13.1917	-10
													-29.611	-30
													63.8497	60
													33.6168	30
													-3.5798	0
													1.3024	0
													10.778	10
													3.3573	0
													-7.8072	-10
													22.2807	20
													-19.1663	-20
													42.7448	40
													-31.6646	-30
													-2.8667	0
													21.0518	20
													5.9583	10
													-26.4611	-30
													22.0367	20
													6.8649	10
													-12.6934	-10
													11.6742	10
													18.7231	20
													47.2888	50
													1.7243	0
													-2.2841	0
													-6.4961	-10
													-34.94	-30
													14.0276	10
													-37.4882	-40
													-1.7968	0
													-1.9006	0
													20.5029	20
													-51.8236	-50
													21.9615	20
													-6.7851	-10
													-22.2602	-20
													3.4256	0
													8.2671	10
													-4.8839	0
													-25.789	-30
													27.7284	30
													7.5468	10
													-10.5375	-10
													27.9273	30
													10.9434	10
													-21.7503	-20
													16.021	20
													-32.3091	-30
													-17.5568	-20
													6.6309	10
													11.8253	10
													5.01	10
													-35.0605	-40
													19.9744	20
													28.8351	30
													26.9469	30
													-7.8066	-10
													-4.278	0
													-16.7487	-20
													8.6041	10
													8.6425	10
													-11.8296	-10
													21.9909	20
													20.6432	20
													16.7425	20
													-11.4693	-10
													-23.17	-20
													16.6445	20
													32.5443	30
													-22.2025	-20
													-40.5638	-40
													32.3222	30
													2.3666	0
													27.1561	30
													23.3103	20
													-20.7716	-20
													-5.0376	-10
													-13.0988	-10
													7.1936	10
													26.926	30
													4.7197	0
													-38.4008	-40
													28.3059	30
													3.6534	0
													-5.5907	-10
													-38.4635	-40
													11.0784	10
													8.5036	10
													10.3716	10
													-17.9613	-20
													-11.0032	-10
													-14.7265	-10
													39.3511	40
													-12.8081	-10
													-0.3342	0
													-14.2029	-10
													21.815	20
													3.3547	0
													5.0563	10
													22.3883	20
													17.1047	20
													19.3194	20
													-39.0548	-40
													7.9986	10
													22.9257	20
													10.5999	10
													21.6363	20
													46.0238	50
													28.5717	30
													-18.8637	-20
													-13.0017	-10
													1.1644	0
													-9.2518	-10
													2.021	0
													28.1623	30
													-7.0273	-10
													-2.1221	0
													-0.9521	0
													17.0905	20
													24.3368	20
													0.6107	0
													-2.7416	0
													22.2719	20
													18.0657	20
													13.3637	10
													68.924	70
													4.234	0
													10.4255	10
													1.9294	0
													15.9284	20
													-6.9	-10
													23.7541	20
													40.182	40
													5.3058	10
													2.2335	0
													-7.6693	-10
													-5.8715	-10
													-30.4707	-30
													2.5256	0
													-14.0269	-10
													28.7178	30
													6.7168	10
													4.6987	0
													31.571	30
													-31.913	-30
													10.1931	10
													-17.5581	-20
													-9.2674	-10
													8.7688	10
													21.4339	20
													-13.1324	-10
													14.663	10
													32.7682	30
													-13.5016	-10
													-16.2425	-20
													3.366	0
													16.1382	20
													3.63	0
													-12.7265	-10
													5.903	10
													7.7414	10
													-5.2912	-10
													-18.8098	-20
													12.3072	10
													3.9418	0
													-3.6597	0
													-9.0247	-10
													-6.4065	-10
													-13.7439	-10
													-17.2019	-20
													28.9086	30
													-1.2292	0
													-30.9806	-30
													-6.1648	-10
													24.8077	20
													-7.1631	-10
													39.1468	40
													-11.9904	-10
													-11.4594	-10
													-17.0627	-20
													26.8768	30
													-8.0021	-10
													11.946	10
													-29.3625	-30
													-7.8535	-10
													16.7846	20
													-22.008	-20
													4.6025	0
													14.5681	10
													39.1689	40
													16.4217	20
													22.5341	20
													-3.4851	0
													-7.9763	-10
													4.7295	0
													-14.2665	-10
													26.0416	30
													19.1166	20
													22.8499	20
													28.8157	30
													1.4416	0
													-7.9432	-10
													14.1127	10
													26.6392	30
													20.7676	20
													22.5115	20
													33.7226	30
													9.5068	10
													27.6819	30
													3.3631	0
													19.39	20
													-24.4716	-20
													34.4421	30
													-31.8981	-30
													7.7131	10
													-3.3242	0
													-19.5797	-20
													10.3165	10
													10.2449	10
													31.8242	30
													6.3373	10
													15.1526	20
													8.4618	10
													32.9534	30
													26.2111	30
													3.8131	0
													6.0867	10
													39.1886	40
													-1.1894	0
													20.7598	20
													-13.9671	-10
													-11.6389	-10
													20.8557	20
													16.5661	20
													24.7618	20
													-9.0638	-10
													23.9598	20
													7.0385	10
													2.6505	0
													37.3829	40
													32.3409	30
													-41.4216	-40
													10.7298	10
													-13.4048	-10
													-2.391	0
													-9.085	-10
													36.0895	40
													28.4214	30
													14.7056	10
													17.6684	20
													12.7633	10
													17.2797	20
													8.6258	10
													0.0299	0
													13.7545	10
													-2.598	0
													-4.2874	0
													-1.7948	0
													1.8374	0
													3.7606	0
													54.2359	50
													-20.8649	-20
													-17.835	-20
													8.5212	10
													2.5878	0
													-11.003	-10
													10.1397	10
													18.6598	20
													-19.4744	-20
													-4.5573	0
													-22.1581	-20
													5.2716	10
													6.876	10
													17.2515	20
													-18.1274	-20
													9.5498	10
													0.7338	0
													31.4391	30
													9.7349	10
													-7.1437	-10
													-0.9786	0
													-7.1244	-10
													32.3804	30
													-6.622	-10
													-28.5367	-30
													-0.4249	0
													26.4701	30
													16.8658	20
													6.8817	10
													39.3081	40
													-8.1542	-10
													8.7807	10
													-13.8367	-10
													-12.1583	-10
													-3.2868	0
													16.5523	20
													44.6825	40
													19.5788	20
													-17.8215	-20
													-0.5031	0
													-7.4889	-10
													-2.2589	0
													27.2046	30
													11.1479	10
													23.4315	20
													15.669	20
													-12.2577	-10
													22.2164	20
													-23.4078	-20
													19.5958	20
													15.5927	20
													25.6086	30
													-24.7948	-20
													-0.4727	0
													3.9583	0
													5.607	10
													21.1271	20
													17.6139	20
													16.6403	20
													7.1706	10
													37.1202	40
													-2.9019	0
													5.623	10
													-7.9338	-10
													2.3694	0
													18.1118	20
													-20.9468	-20
													7.4186	10
													-11.0964	-10
													19.3677	20
													-35.7076	-40
													-35.5105	-40
													36.0859	40
													0.6116	0
													-35.7654	-40
													-30.1228	-30
													1.8616	0
													9.7477	10
													10.3509	10
													24.9398	20
													10.2588	10
													2.1303	0
													24.5551	20
													44.7773	40
													4.1339	0
													-1.2105	0
													24.3695	20
													-6.5445	-10
													-26.0616	-30
													1.4702	0
													8.5053	10
													6.5159	10
													-18.7617	-20
													-8.3388	-10
													-9.9898	-10
													22.7011	20
													0.984	0
													16.5881	20
													15.5703	20
													-0.25	0
													-36.016	-40
													10.8588	10
													17.679	20
													-11.4519	-10
													3.2617	0
													-5.2333	-10
													37.6267	40
													2.9886	0
													7.6784	10
													-17.3562	-20
													-11.1074	-10
													-23.5313	-20
													18.1717	20
													15.7437	20
													-12.9657	-10
													61.3529	60
													21.9827	20
													11.7158	10
													41.9237	40
													-45.5138	-50
													1.7787	0
													3.1064	0
													7.5987	10
													-17.1663	-20
													14.1873	10
													-40.7424	-40
													5.7483	10
													12.3782	10
													2.7801	0
													10.8862	10
													-11.674	-10
													14.5905	10
													-3.8928	0
													-29.5832	-30
													-2.6046	0
													-8.7989	-10
													-16.8918	-20
													13.7	10
													4.4095	0
													-1.4946	0
													-7.3547	-10
													37.1319	40
													27.0601	30
													-0.1812	0
													5.3315	10
													33.8512	30
													39.4654	40
													25.6524	30
													-2.9169	0
													-8.0563	-10
													18.6317	20
													-13.6747	-10
													-17.8175	-20
													-3.5047	0
													22.7176	20
													6.7856	10
													8.4988	10
													26.095	30
													8.2926	10
													-19.1712	-20
													20.4419	20
													13.1268	10
													1.8322	0
													-4.6607	0
													-7.2917	-10
													3.1199	0
													-12.4103	-10
													-6.6438	-10
													-26.1335	-30
													-6.7728	-10
													-10.2646	-10
													15.153	20
													32.6993	30
													24.3097	20
													24.5365	20
													17.1242	20
													14.5319	10
													18.5998	20
													-10.9968	-10
													20.264	20
													-20.371	-20
													15.9755	20
													-13.0483	-10
													-15.8099	-20
													-5.4702	-10
													-22.4542	-20
													3.9195	0
													25.8132	30
													-1.3875	0
													13.514	10
													6.8407	10
													27.8364	30
													0.4337	0
													9.4594	10
													52.9543	50
													26.5247	30
													-15.0769	-20
													25.9958	30
													-14.8845	-10
													3.7981	0
													9.3873	10
													21.0001	20
													-4.3452	0
													14.3572	10
													38.9947	40
													-34.5097	-30
													-17.935	-20
													27.4988	30
													-2.279	0
													2.8364	0
													22.0787	20
													48.0612	50
													-22.4379	-20
													-14.5798	-10
													2.05	0
													3.6102	0
													5.7371	10
													-2.6493	0
													27.9929	30
													-14.5912	-10
													7.6795	10
													23.3949	20
													11.104	10
													-8.8425	-10
													6.0111	10
													-2.7479	0
													-8.3937	-10
													30.6631	30
													-0.3534	0
													-7.96	-10
													-11.5194	-10
													6.024	10
													-26.3168	-30
													-29.3232	-30
													7.4579	10
													-22.1954	-20
													-4.397	0
													19.1081	20
													22.043	20
													34.4907	30
													-16.5912	-20
													20.7341	20
													10.1057	10
													28.6488	30
													8.0032	10
													19.9039	20
													26.3884	30
													-4.6342	0
													-5.6213	-10
													-22.981	-20
													1.85	0
													10.7089	10
													-11.2628	-10
													5.0406	10
													-3.5281	0
													-5.0338	-10
													19.1866	20
													19.9265	20
													26.5661	30
													-18.0992	-20
													0.8776	0
													16.7018	20
													-22.2692	-20
													42.1348	40
													8.265	10
													-7.3004	-10
													24.2562	20
													11.1427	10
													5.7851	10
													-10.0038	-10
													-31.7078	-30
													-15.6714	-20
													-9.3127	-10
													12.6506	10
													15.89	20
													-12.106	-10
													20.1635	20
													16.9483	20
													1.09	0
													-15.4246	-20
													21.4408	20
													1.0056	0
													-16.6697	-20
													8.6457	10
													14.0717	10
													-25.6326	-30
													40.9281	40
													-39.381	-40
													-29.1047	-30
													28.0804	30
													10.1035	10
													-4.9783	0
													3.8319	0
													18.2264	20
													-13.7605	-10
													22.1632	20
													17.5463	20
													2.697	0
													7.4242	10
													-8.9753	-10
													-13.5323	-10
													-4.1743	0
													24.1702	20
													-1.1944	0
													-5.4325	-10
													-15.9853	-20
													-19.0689	-20
													4.0424	0
													24.4048	20
													28.2297	30
													14.8036	10
													-2.5808	0
													-3.7521	0
													10.9127	10
													22.3488	20
													23.0849	20
													-38.7785	-40
													2.6707	0
													-15.7356	-20
													-5.825	-10
													38.3045	40
													-11.9506	-10
													-30.0759	-30
													7.1405	10
													1.1104	0
													-4.7111	0
													21.1892	20
													14.9226	10
													11.1183	10
													-1.9391	0
													10.602	10
													-2.2261	0
													7.3216	10
													15.132	20
													10.3931	10
													-9.8565	-10
													-7.1403	-10
													-17.2032	-20
													23.5457	20
													3.0789	0
													-9.54	-10
													17.1549	20
													-6.6167	-10
													12.5201	10
													33.9327	30
													22.3551	20
													0.3967	0
													1.3232	0
													42.3425	40
													0.184	0
													9.6234	10
													10.1198	10
													22.0967	20
													7.9058	10
													10.925	10
													10.043	10
													57.3801	60
													21.1214	20
													-13.9298	-10
													-20.7489	-20
													-28.6968	-30
													40.4016	40
													-12.7785	-10
													23.4427	20
													14.2764	10
													-26.9345	-30
													44.0572	40
													14.6459	10
													40.0028	40
													10.4529	10
													7.1912	10
													-16.7864	-20
													4.352	0
													6.3425	10
													-26.821	-30
													3.2216	0
													6.8649	10
													-10.823	-10
													11.8121	10
													-20.6526	-20
													-7.8749	-10
													5.7078	10
													-8.5019	-10
													12.0359	10
													-3.6562	0
													-13.8823	-10
													22.2319	20
													15.6008	20
													15.0272	20
													17.3022	20
													23.7884	20
													23.4174	20
													4.2738	0
													-5.4054	-10
													1.3869	0
													28.3572	30
													-20.3572	-20
													-7.6879	-10
													24.4662	20
													20.52	20
													-6.3107	-10
													-0.5364	0
													0.4841	0
													-1.908	0
													-45.265	-50
													-4.9465	0
													9.7812	10
													52.6315	50
													-25.6526	-30
													-9.1108	-10
													-4.1095	0
													-15.2456	-20
													-9.8755	-10
													-34.8849	-30
													1.3516	0
													-6.7702	-10
													14.2997	10
													4.7482	0
													24.9163	20
													36.0147	40
